# Supplementary material
Source: PubMed Central journal article supplement (PMC9037952)
Supplement: NIHMS1748098-supplement-Supplementary_Information.pdf [file NIHMS1748098-supplement-Supplementary_Information.pdf]

**Supplementary information**

---

**Electrolyte-gated transistors for enhanced performance bioelectronics**

---

In the format provided by the authors and unedited

## Supplementary Information

### Electrolyte-gated transistors for enhanced performance bioelectronics

Fabrizio Torricelli,<sup>1,†</sup> Demetra Z. Adrahtas,<sup>2</sup> Zhenan Bao,<sup>3</sup> Magnus Berggren,<sup>4</sup>  
Fabio Biscarini,<sup>5,6</sup> Annalisa Bonfiglio,<sup>7</sup> Carlo A. Bortolotti,<sup>5</sup> C. Daniel Frisbie,<sup>2</sup>  
Eleonora Macchia,<sup>8</sup> George G. Malliaras,<sup>9</sup> Iain McCulloch,<sup>10,11</sup> Maximilian Moser,<sup>11</sup> Thuc-  
Quyen Nguyen,<sup>12</sup> Róisín M. Owens,<sup>13</sup> Alberto Salleo,<sup>14</sup> Andrea Spanu,<sup>7</sup> Luisa Torsi<sup>15,†</sup>

<sup>1</sup> Department of Information Engineering, University of Brescia, via Branze 38, 25123 Brescia, Italy

<sup>2</sup> Department of Chemical Engineering & Materials Science, University of Minnesota, 421 Washington Ave. SE, Minneapolis, MN 55455, United States

<sup>3</sup> Department of Chemical Engineering, Stanford University, Stanford, CA 94305, United States

<sup>4</sup> Laboratory of Organic Electronics, Department of Science and Technology, Linköping University, Norrköping, SE-601 74, Sweden

<sup>5</sup> Dipartimento di Scienze della Vita, Università degli Studi di Modena e Reggio Emilia, 41125 Modena, Italy

<sup>6</sup> Center for Translational Neurophysiology of Speech and Communication, Istituto Italiano di Tecnologia, 44121 Ferrara, Italy

<sup>7</sup> Department of Electrical and Electronic Engineering, University of Cagliari, Piazza d'Armi, 09123 Cagliari, Italy

<sup>8</sup> Faculty of Science and Engineering, Åbo Akademi University, 20500 Turku, Finland

<sup>9</sup> Electrical Engineering Division, Department of Engineering, University of Cambridge, Cambridge, CB3 0FA, United Kingdom

<sup>10</sup> Physical Sciences and Engineering Division, KAUST Solar Center (KSC), King Abdullah University of Science and Technology (KAUST), Thuwal, 23955-6900 Saudi Arabia

<sup>11</sup> Department of Chemistry, Chemistry Research Laboratory, University of Oxford, Oxford, OX1 3TA, UK

<sup>12</sup> Department of Chemistry & Biochemistry, University of California Santa Barbara, Santa Barbara, CA 93106-9510

<sup>13</sup> Department of Chemical Engineering and Biotechnology, University of Cambridge, Cambridge, United Kingdom

<sup>14</sup> Department of Materials Science and Engineering, Stanford University, Stanford, CA 94305, United States

<sup>15</sup> Department of chemistry, University of Bari "Aldo Moro", via Orabona 4, 70125 Bari, Italy

<sup>†</sup>Co-corresponding authors: [fabrizio.torricelli@unibs.it](mailto:fabrizio.torricelli@unibs.it) and [luisa.torsi@uniba.it](mailto:luisa.torsi@uniba.it)

Supplementary Table 1 | Properties of EGT channel ion permeable and ion impermeable semiconductors.

| Conjugated Polyelectrolytes |                                                          |                          |                                                                   |      |
|-----------------------------|----------------------------------------------------------|--------------------------|-------------------------------------------------------------------|------|
| OECT Material               | $\mu$ (cm <sup>2</sup> V <sup>-1</sup> s <sup>-1</sup> ) | C* (F cm <sup>-3</sup> ) | $[\mu C^*]$ (F cm <sup>-1</sup> V <sup>-1</sup> s <sup>-1</sup> ) | Ref. |
| PEDOT-S <sup>a</sup>        | -                                                        | -                        | -                                                                 | 1    |
| PTEBS <sup>a</sup>          | -                                                        | -                        | -                                                                 | 1    |
| P3CPT                       | -                                                        | -                        | -                                                                 | 2    |
| PTHS + EG                   | 0.0013                                                   | 124                      | 0.16                                                              | 3,4  |
| CPE-K                       | -                                                        | 134                      | -                                                                 | 5    |

  

| Conjugated Polymer Composites                        |                                                          |                          |                                                                   |      |
|------------------------------------------------------|----------------------------------------------------------|--------------------------|-------------------------------------------------------------------|------|
| OECT Material                                        | $\mu$ (cm <sup>2</sup> V <sup>-1</sup> s <sup>-1</sup> ) | C* (F cm <sup>-3</sup> ) | $[\mu C^*]$ (F cm <sup>-1</sup> V <sup>-1</sup> s <sup>-1</sup> ) | Ref. |
| PEDOT:PSS + EG                                       | 1.9                                                      | 3.9                      | 47                                                                | 4,6  |
| PEDOT:PSS + EG                                       | -                                                        | 31                       | 100                                                               | 7    |
| PEDOT:PSS + H <sub>2</sub> SO <sub>4</sub>           | -                                                        | 113                      | 490                                                               | 7    |
| PEDOT:PSS + Acetone                                  | 2.42-7.34                                                | 64                       | 174-445                                                           | 8    |
| (microfiber)                                         |                                                          |                          |                                                                   |      |
| PEDOT:PSS + Acetone + H <sub>2</sub> SO <sub>4</sub> | 4.22-12.86                                               | 122                      | 549-1500                                                          | 8    |
| (microfiber)                                         |                                                          |                          |                                                                   |      |
| PEDOT:TOS                                            | 0.93                                                     | 136                      | 72                                                                | 9    |
| PEDOT:PSTFSILi100                                    | 0.23                                                     | 26                       | 20                                                                | 9,10 |
| PEDOT:DS + EG                                        | 0.0064                                                   | 65                       | 2.2                                                               | 9,11 |
| PEDOT:PMATFSILi80                                    | 0.0024                                                   | 27                       | 0.15                                                              | 9,10 |

  

| Conjugated Polymers (p-type) |                                                          |                          |                                                                   |       |
|------------------------------|----------------------------------------------------------|--------------------------|-------------------------------------------------------------------|-------|
| OECT Material                | $\mu$ (cm <sup>2</sup> V <sup>-1</sup> s <sup>-1</sup> ) | C* (F cm <sup>-3</sup> ) | $[\mu C^*]$ (F cm <sup>-1</sup> V <sup>-1</sup> s <sup>-1</sup> ) | Ref.  |
| p(g2T2-T)                    | ~0.0001                                                  | 8                        | 9                                                                 | 12    |
| p(g3T2-T)                    | 0.16                                                     | 211                      | 135                                                               | 12,13 |
| p(g4T2-T)                    | 0.06                                                     | 192                      | 54                                                                | 12    |
| p(g6T2-T)                    | -                                                        | -                        | -                                                                 | 12    |
| p(g2T-TT)                    | 0.94                                                     | 241                      | 261                                                               | 3,4   |
| gBDT-g2T                     | 0.018                                                    | 77                       | 4.8                                                               | 13    |
| p(g3T2)                      | 0.90                                                     | 156                      | 161                                                               | 14    |
| p(g2T2-g4T2)                 | 1.72                                                     | 187                      | 522                                                               | 14    |
| p(g1T2-g5T2)                 | 2.61                                                     | 133                      | 496                                                               | 14    |
| p(g0T2-g6T2)                 | 2.95                                                     | 74                       | 302                                                               | 14    |
| p(gDPP-T2)                   | 1.55                                                     | 196                      | 342                                                               | 15    |
| p(gDPP-TT)                   | 0.57                                                     | 184                      | 125                                                               | 15    |
| p(gDPP-MeOT2)                | 0.28                                                     | 169                      | 57                                                                | 15    |
| p(gPyDPP-MeOT2)              | 0.03                                                     | 60                       | -                                                                 | 16    |
| P3MEEMT                      | 0.19                                                     | 175                      | 53                                                                | 17    |

  

| Conjugated Polymers (n-type) |                                                          |                          |                                                                   |      |
|------------------------------|----------------------------------------------------------|--------------------------|-------------------------------------------------------------------|------|
| OECT Material                | $\mu$ (cm <sup>2</sup> V <sup>-1</sup> s <sup>-1</sup> ) | C* (F cm <sup>-3</sup> ) | $[\mu C^*]$ (F cm <sup>-1</sup> V <sup>-1</sup> s <sup>-1</sup> ) | Ref. |
| BBL                          | 0.0007                                                   | 930                      | -                                                                 | 2    |
| p(gNDI-gT2)                  | 0.00031                                                  | 397                      | 0.18                                                              | 4,18 |
| p(C3-gNDI-gT2)               | -                                                        | 72                       | 0.13                                                              | 19   |
| p(C6-gNDI-gT2)               | -                                                        | 59                       | 0.16                                                              | 19   |
| PgNaN                        | 0.0065                                                   | 100                      | 0.662                                                             | 20   |
| PgNgN                        | 0.00019                                                  | 239                      | 0.037                                                             | 20   |

| Organic Semiconductors |                                                          |                             |       |
|------------------------|----------------------------------------------------------|-----------------------------|-------|
| EGOFET Material        | $\mu$ (cm <sup>2</sup> V <sup>-1</sup> s <sup>-1</sup> ) | $C^*$ (F cm <sup>-2</sup> ) | Ref.  |
| P3HT                   | ~0.1                                                     | 3 – 6 10 <sup>-6</sup>      | 21    |
| pBTTT-C14              | ~0.7                                                     | 1 – 5 10 <sup>-6</sup>      | 22,23 |
| DPP-DTT                | ~7.5                                                     | 7 10 <sup>-6</sup>          | 24,25 |
| Pentacene              | ~0.5                                                     | 7.8 10 <sup>-6</sup>        | 26    |
| $\alpha$ 6T            | ~0.4                                                     | 2 10 <sup>-6</sup>          | 27    |
| DDFTTF                 | ~0.2                                                     | -                           | 28    |

( $\mu$ , electronic charge carrier mobility;  $C^*$ , capacitance per univ volume. <sup>a</sup>A polymer-in-salt electrolyte was employed rather than the common aqueous 0.1 M sodium chloride solution.

Supplementary Table 2 | **Key figures of merit for electrolyte gated transistors with inorganic semiconductor channels.**  $\mu$  is the electronic mobility,  $C_G$  is the gate capacitance per unit area,  $V_T$  is the threshold voltage,  $g_m$  the maximum transconductance and  $W$  the channel width.

| Semiconductor                            | Electrolyte                                                          | $\mu$ (cm <sup>2</sup> V <sup>-1</sup> s <sup>-1</sup> ) | $C_G$ ( $\mu$ F cm <sup>-2</sup> ) | $I_{ON}/I_{OFF}$                  | $V_T$ (V)                           | $g_m/W$ (S m <sup>-1</sup> ) | Ref.  |
|------------------------------------------|----------------------------------------------------------------------|----------------------------------------------------------|------------------------------------|-----------------------------------|-------------------------------------|------------------------------|-------|
| <b>a-InGaZnO<sub>5</sub></b><br>(a-IGZO) | -                                                                    | 3.4                                                      | -                                  | 10 <sup>3</sup>                   | -                                   | -                            | 29    |
|                                          | Deionized water                                                      | -                                                        | -                                  | 1.4 10 <sup>3</sup>               | -0.41                               | -                            | 30    |
|                                          | Hydrated bovine serum albumin                                        | 116.9 ± 4.6                                              | 1.3                                | 1.8 10 <sup>5</sup>               | 0.25                                | -                            | 31    |
|                                          | Polymer [polyethylene oxide (PEO) + LiClO <sub>4</sub> ]             | 42                                                       | 30                                 | 10 <sup>4</sup> - 10 <sup>5</sup> | 0.7-0.8                             | -                            | 32    |
|                                          | Composite solid polymer electrolyte (CSPE)                           | >100                                                     | 10                                 | 10 <sup>6</sup> - 10 <sup>7</sup> | 0.2 – -0.2                          | >30                          | 33    |
| <b>In<sub>2</sub>O<sub>3</sub></b>       | CSPE                                                                 | 5                                                        | 23 – 48                            | -                                 | 0.07 (top-gate)<br>0.26 (side-gate) | -                            | 34,35 |
|                                          | CSPE                                                                 | -                                                        | (5 – 30) 10 <sup>-3</sup>          | ~ 10 <sup>5</sup>                 | 0.01 – -0.27                        | -                            | 36    |
|                                          | SPE                                                                  | 0.26                                                     | ~ 3.2                              | 2 10 <sup>3</sup>                 | 0.54                                | -                            | 37    |
|                                          | CSPE                                                                 | >5                                                       | 7.6                                | >2 10 <sup>4</sup>                | -0.22                               | 3.12                         | 34    |
|                                          | Ion gel                                                              | -                                                        | 5.4                                | 1.3 10 <sup>6</sup>               | ~ -0.2                              | -                            | 38    |
|                                          | CSPE                                                                 | 16                                                       | 10 – 42                            | ~ 10 <sup>5</sup>                 | 0.23                                | -                            | 39    |
| <b>ZnO</b>                               | 0.1 M KCl                                                            | 0.81                                                     | 8.04                               | 10 <sup>3</sup>                   | 0.57                                | 0.107                        | 40    |
|                                          | Ion gel                                                              | 2 – 9                                                    | 24                                 | >10 <sup>5</sup>                  | 0.5                                 | 19                           | 41    |
|                                          | Ion gel                                                              | 1.61 ± 0.09                                              | 3.80                               | 2.15 10 <sup>5</sup>              | 0.9 ± 0.05                          | -                            | 42    |
|                                          | Ion gel                                                              | 2.06                                                     | 2-31                               | ≥ 10 <sup>4</sup>                 | < 2                                 | -                            | 43    |
| <b>Graphene</b>                          | Phthalate buffer, Phosphate buffer solution (PBS), and borate buffer | 1000 (hole)<br>2000 (electron)                           | 2                                  | -                                 | ~ 0.04                              | 3.6                          | 44    |
|                                          | Sodium phosphate buffer                                              | 1700 (hole)                                              | 2                                  | -                                 | 0.43                                | 4.23 10 <sup>-3</sup> S/V    | 45    |
| <b>Carbon nanotubes</b>                  | NaCl                                                                 | 1000 - 4000                                              | 7 10 <sup>-5</sup>                 | -                                 | -                                   | 7 10 <sup>3</sup>            | 46    |
|                                          | Dulbecco's modified Eagle's medium (DMEM)                            | -                                                        | -                                  | -                                 | ~ -0.4                              | 5.5 10 <sup>-3</sup>         | 47    |
|                                          | Ion gel                                                              | 9 ± 4 (hole)<br>3 ± 1 (electron)                         | -                                  | 3 10 <sup>5</sup>                 | -0.53                               | -                            | 48    |
|                                          | Polyfluorinated electrolyte                                          | 11.5 (hole)<br>14.7 (electron)                           | 10                                 | >10 <sup>5</sup>                  | 0.66<br>-0.32<br>0.68               | 2                            | 49    |
|                                          | Ion gel                                                              | > 10                                                     | -                                  | > 10 <sup>3</sup>                 | -                                   | -                            | 50    |
| <b>MoS<sub>2</sub></b>                   | Ionic liquid ([EMIM] [TFSI])                                         | ~ 0.16                                                   | 1.9 F cm <sup>-3</sup>             | 10 <sup>2</sup>                   | ~0.2                                | -                            | 51    |
|                                          | PBS                                                                  | 13.5                                                     | -                                  | 10 <sup>7</sup>                   | -0.29                               | -                            | 52    |
|                                          | PMMA/LiClO <sub>4</sub> /PC/EC                                       | -                                                        | 10                                 | 10 <sup>4</sup>                   | < 1                                 | -                            | 53    |
|                                          | Ion gel                                                              | 9                                                        | 5.9                                | 10 <sup>7</sup>                   | 0.2                                 | -                            | 54    |
|                                          | PBS                                                                  | 26                                                       | 5.2                                | 10 <sup>4</sup>                   | 0.11                                | 1.98                         | 55    |
| <b>WS<sub>2</sub></b>                    | Ionic liquid ([EMIM] [TFSI])                                         | 0.01                                                     | 30 F/cm <sup>3</sup>               | > 10 <sup>4</sup>                 | 1.0 ± 0.1                           | 0.27                         | 56    |
| <b>ITO</b>                               | Starch-based solid electrolyte                                       | 14.9                                                     | 1.6                                | 1.9 10 <sup>7</sup>               | ~0.2                                | -                            | 57    |
| <b>Tellurene</b>                         | LiClO <sub>4</sub> /PEO                                              | ~ 500                                                    | -                                  | 10 <sup>5</sup> – 10 <sup>6</sup> | -                                   | -                            | 58    |

Supplementary Table 3 | Strategies for direct grafting of linkers to the gate electrode.

| Linker type                                                                                        | Interaction                                                                                                                                                                                                                               | Methodology                                                                                                                                                                                                                                                                                                         |
|----------------------------------------------------------------------------------------------------|-------------------------------------------------------------------------------------------------------------------------------------------------------------------------------------------------------------------------------------------|---------------------------------------------------------------------------------------------------------------------------------------------------------------------------------------------------------------------------------------------------------------------------------------------------------------------|
| <b>Polyhistidine Tag (synthetic hexamer of histidine).</b> <sup>59,60</sup>                        | <ul style="list-style-type: none"> <li>- Electrostatic interactions (image potential, p-stacking).</li> <li>- Coordination binding to divalent cations (Cu<sup>2+</sup>, Ni<sup>2+</sup>) chelated by surface bound molecules.</li> </ul> | To graft an engineered protein bearing the Polyhistidine Tag to the metal surface. This approach is most effective for Ni and Au electrodes, albeit can be extended to any metal surface.                                                                                                                           |
| <b>Thiolated flexible linkers.</b> <sup>61</sup>                                                   | Metal-Sulphur (M-S) covalent bond between metal atoms and thiol.                                                                                                                                                                          | To directly bind oligonucleotides and aptamers to metal electrodes.                                                                                                                                                                                                                                                 |
| <b>Naturally occurring or engineered cysteine.</b> <sup>23,62,63</sup>                             | M-S covalent bond between surface atoms and cysteine.                                                                                                                                                                                     | To graft native or mutant proteins (including antibodies and enzymes) by exploiting exposed cysteine(s).                                                                                                                                                                                                            |
| <b>Amines</b> <sup>64</sup> ,<br><b>aryldiazonium salts</b> <sup>25</sup>                          | Covalent bond between the surface and either amine nitrogen or the aryl group.                                                                                                                                                            | To electrograft typically low molecular weight probes such as oligopeptides on different substrates <sup>65</sup> either through oxidative (amines) or reductive (diazonium salts) electrografting.                                                                                                                 |
| <b>Alkanethiol SAMs terminated with</b><br><b>a) carboxylic acid, or</b><br><b>b) amino group.</b> | <ul style="list-style-type: none"> <li>- M-S covalent bond;</li> <li>- Amide bond with proteins.</li> </ul>                                                                                                                               | This methodology requires two steps: i) Chemical activation by EDC/NHS reaction of -COOH group either as SAM terminal group or the protein C-terminus; ii) Constructive assembly of a protein monolayer on SAM by formation of amide bond with the activated COOH.                                                  |
| <b>Alkanethiol SAMs terminated with hydrophilic group.</b> <sup>62</sup>                           | <ul style="list-style-type: none"> <li>- M-S covalent bond;</li> <li>- Hydrogen bonds.</li> </ul> alternatively,<br><ul style="list-style-type: none"> <li>- Condensation reaction.</li> </ul>                                            | This strategy has been used in EGTs only for passivation or redox/pH switching. It could be exploited to graft a second monolayer by either i) hydrophilic (non-covalent) interactions, or ii) condensation, forming ester or siloxane bonds.                                                                       |
| <b>Alkanethiol SAMs terminated with hydrophobic groups.</b>                                        | <ul style="list-style-type: none"> <li>- M-S covalent bond;</li> <li>- Hydrophobic interactions.</li> <li>- Van der Waals interactions.</li> </ul>                                                                                        | This strategy has not been explored yet in EGT sensors. It could be exploited to assemble lipid membranes (mono- or bilayer) intercalated with proteins and enzymes.                                                                                                                                                |
| <b>Binary SAMs</b> <sup>66,67</sup>                                                                | <ul style="list-style-type: none"> <li>- Exchange of one of the two components with a thiolated linker.</li> <li>- Formation of amide bond with proteins with EDC/NHS.</li> </ul>                                                         | Examples include mercaptoundecanoic acid (MUA) mixed with mercaptohexanoic (MHA) or -propionic acid (MPA). Biorecognition group is built on MUA, while the shorter MHA or MPA reorganizes at multiple length scales upon recognition. This “domino effect” amplifies the signal change due to local binding events. |

|                                                                      |                                                      |                                                                                                                                                                                                                                                                                                     |
|----------------------------------------------------------------------|------------------------------------------------------|-----------------------------------------------------------------------------------------------------------------------------------------------------------------------------------------------------------------------------------------------------------------------------------------------------|
| <b>SAMs that chemically bind the target molecules.</b> <sup>68</sup> | Formation of covalent bonds between SAM and analyte. | This strategy is effective for homolog family, like catecholamines with phenylboronic acid-terminated SAM. However, the non-reversibility of the covalent bonds between probe and target leads to “poisoning” of the sensor, with consequent decrease of sensitivity and dynamic range of response. |
|----------------------------------------------------------------------|------------------------------------------------------|-----------------------------------------------------------------------------------------------------------------------------------------------------------------------------------------------------------------------------------------------------------------------------------------------------|

## References

1. Zeglio, E. *et al.* Conjugated Polyelectrolyte Blends for Electrochromic and Electrochemical Transistor Devices. *Chem. Mater.* **27**, 6385–6393 (2015).
2. Sun, H. *et al.* Complementary Logic Circuits Based on High-Performance n-Type Organic Electrochemical Transistors. *Adv. Mater.* **30**, 1704916 (2018).
3. Giovannitti, A. *et al.* Controlling the mode of operation of organic transistors through side-chain engineering. *Proc. Natl. Acad. Sci. U. S. A.* **113**, 12017–12022 (2016).
4. Inal, S., Malliaras, G. G. & Rivnay, J. Benchmarking organic mixed conductors for transistors. *Nat. Commun.* **8**, 1767 (2017).
5. Lill, A. T. *et al.* Organic Electrochemical Transistors Based on the Conjugated Polyelectrolyte PCPDTBT-SO<sub>3</sub> K (CPE-K). *Adv. Mater.* **32**, 1908120 (2020).
6. Rivnay, J. *et al.* Structural control of mixed ionic and electronic transport in conducting polymers. *Nat. Commun.* **7**, 11287 (2016).
7. Kim, S.-M. *et al.* Influence of PEDOT:PSS crystallinity and composition on electrochemical transistor performance and long-term stability. *Nat. Commun.* **9**, 3858 (2018).
8. Kim, Y. *et al.* Strain-Engineering Induced Anisotropic Crystallite Orientation and Maximized Carrier Mobility for High-Performance Microfiber-Based Organic Bioelectronic Devices. *Adv. Mater.* **33**, 2007550 (2021).
9. Inal, S. *et al.* A High Transconductance Accumulation Mode Electrochemical Transistor. *Adv. Mater.* **26**, 7450–7455 (2014).
10. Inal, S. *et al.* Organic electrochemical transistors based on PEDOT with different anionic polyelectrolyte dopants. *J. Polym. Sci. Part B Polym. Phys.* **54**, 147–151 (2016).
11. Harman, D. G. *et al.* Poly(3,4-ethylenedioxythiophene):dextran sulfate (PEDOT:DS) - A highly processable conductive organic biopolymer. *Acta Biomater.* **14**, (2015).
12. Moser, M. *et al.* Ethylene Glycol-Based Side Chain Length Engineering in Polythiophenes and its Impact on Organic Electrochemical Transistor Performance. *Chem. Mater.* **32**, 6618–6628 (2020).
13. Nielsen, C. B. *et al.* Molecular Design of Semiconducting Polymers for High-Performance Organic Electrochemical Transistors. *J. Am. Chem. Soc.* **138**, 10252–10259 (2016).
14. Moser, M. *et al.* Side Chain Redistribution as a Strategy to Boost Organic Electrochemical Transistor Performance and Stability. *Adv. Mater.* **32**, 1–6 (2020).
15. Moser, M. *et al.* Polaron Delocalization in Donor–Acceptor Polymers and its Impact on Organic Electrochemical Transistor Performance. *Angew. Chemie* **133**, 7856–7864 (2021).
16. Giovannitti, A. *et al.* Energetic Control of Redox-Active Polymers toward Safe Organic Bioelectronic Materials. *Adv. Mater.* **32**, 1–9 (2020).
17. Flagg, L. Q. *et al.* Polymer Crystallinity Controls Water Uptake in Glycol Side-Chain Polymer Organic Electrochemical Transistors. *J. Am. Chem. Soc.* **141**, 4345–4354



- (2019).
18. Giovannitti, A. *et al.* N-type organic electrochemical transistors with stability in water. *Nat. Commun.* **7**, 13066 (2016).
  19. Maria, I. P. *et al.* The Effect of Alkyl Spacers on the Mixed Ionic-Electronic Conduction Properties of N-Type Polymers. *Adv. Funct. Mater.* 2008718 (2021). doi:10.1002/adfm.202008718
  20. Chen, X. *et al.* n-Type Rigid Semiconducting Polymers Bearing Oligo(Ethylene Glycol) Side Chains for High-Performance Organic Electrochemical Transistors. *Angew. Chemie Int. Ed. anie.*202013998 (2021). doi:10.1002/anie.202013998
  21. Kergoat, L. *et al.* A water-gate organic field-effect transistor. *Adv. Mater.* **22**, 2565–2569 (2010).
  22. McCulloch, I. *et al.* Liquid-crystalline semiconducting polymers with high charge-carrier mobility. *Nat. Mater.* **5**, 328–333 (2006).
  23. Mulla, M. Y. *et al.* Capacitance-modulated transistor detects odorant binding protein chiral interactions. *Nat. Commun.* **6**, 6010 (2015).
  24. Li, J. *et al.* A stable solution-processed polymer semiconductor with record high-mobility for printed transistors. *Sci. Rep.* **2**, 754 (2012).
  25. Nguyen, T. T. K. *et al.* Triggering the Electrolyte-Gated Organic Field-Effect Transistor output characteristics through gate functionalization using diazonium chemistry: Application to biodetection of 2,4-dichlorophenoxyacetic acid. *Biosens. Bioelectron.* **113**, 32–38 (2018).
  26. Cramer, T. *et al.* Double layer capacitance measured by organic field effect transistor operated in water. *Appl. Phys. Lett.* **100**, 143302 (2012).
  27. Buth, F., Donner, A., Sachsenhauser, M., Stutzmann, M. & Garrido, J. A. Biofunctional Electrolyte-Gated Organic Field-Effect Transistors. *Adv. Mater.* **24**, 4511–4517 (2012).
  28. Roberts, M. E., Mannsfeld, S. C. B., Tang, M. L. & Bao, Z. Influence of Molecular Structure and Film Properties on the Water-Stability and Sensor Characteristics of Organic Transistors. *Chem. Mater.* **20**, 7332–7338 (2008).
  29. Kumar, N., Kumar, J. & Panda, S. Back-channel electrolyte-gated a-IGZO dual-gate thin-film transistor for enhancement of pH sensitivity over nernst limit. *IEEE Electron Device Lett.* **37**, 500–503 (2016).
  30. Chae, M. S., Park, J. H., Son, H. W., Hwang, K. S. & Kim, T. G. IGZO-based electrolyte-gated field-effect transistor for in situ biological sensing platform. *Sensors Actuators, B Chem.* **262**, 876–883 (2018).
  31. Chen, S. H. *et al.* High performance electric-double-layer amorphous IGZO thin-film transistors gated with hydrated bovine serum albumin protein. *Org. Electron.* **24**, 200–204 (2015).
  32. Samanta, C., Ghimire, R. R. & Ghosh, B. Fabrication of Amorphous Indium-Gallium-Zinc-Oxide Thin-Film Transistor on Flexible Substrate Using a Polymer Electrolyte as Gate Dielectric. *IEEE Trans. Electron Devices* **65**, 2827–2832 (2018).
  33. Cherukupally, N., Divya, M. & Dasgupta, S. A Comparative Study on Printable Solid

- Electrolytes toward Ultrahigh Current and Environmentally Stable Thin Film Transistors. *Adv. Electron. Mater.* **2000788**, 1–11 (2020).
34. Dasgupta, S. *et al.* Printed and electrochemically gated, high-mobility, inorganic oxide nanoparticle FETs and their suitability for high-frequency applications. *Adv. Funct. Mater.* **22**, 4909–4919 (2012).
  35. Feng, X. *et al.* Impact of Intrinsic Capacitances on the Dynamic Performance of Printed Electrolyte-Gated Inorganic Field Effect Transistors. *IEEE Trans. Electron Devices* **66**, 3365–3370 (2019).
  36. Marques, G. C. *et al.* Influence of Humidity on the Performance of Composite Polymer Electrolyte-Gated Field-Effect Transistors and Circuits. *IEEE Trans. Electron Devices* **66**, 2202–2207 (2019).
  37. Dasgupta, S., Kruk, R. & Hahn, H. Inkjet Printed , High Mobility Inorganic-Oxide Field Effect Temperature. *ACS Nano* **5**, 9628–9638 (2011).
  38. Jeong, J. *et al.* Ink-Jet Printable, Self-Assembled, and Chemically Crosslinked Ion-Gel as Electrolyte for Thin Film, Printable Transistors. *Adv. Mater. Interfaces* **6**, 1–7 (2019).
  39. Singaraju, S. A. *et al.* Development of Fully Printed Electrolyte-Gated Oxide Transistors Using Graphene Passive Structures. *ACS Appl. Electron. Mater.* **1**, 1538–1544 (2019).
  40. Bandiello, E., Sessolo, M. & Bolink, H. J. Aqueous electrolyte-gated ZnO transistors for environmental and biological sensing. *J. Mater. Chem. C* **2**, 10277–10281 (2014).
  41. Zare Bidoky, F. *et al.* Sub-3 V ZnO Electrolyte-Gated Transistors and Circuits with Screen-Printed and Photo-Crosslinked Ion Gel Gate Dielectrics: New Routes to Improved Performance. *Adv. Funct. Mater.* **1902028**, 1–9 (2019).
  42. Hong, K., Kim, S. H., Lee, K. H. & Frisbie, C. D. Printed, sub-2V ZnO electrolyte gated transistors and inverters on plastic. *Adv. Mater.* **25**, 3413–3418 (2013).
  43. Cho, K. G. *et al.* Sub-2 V, Transfer-Stamped Organic/Inorganic Complementary Inverters Based on Electrolyte-Gated Transistors. *ACS Appl. Mater. Interfaces* **10**, 40672–40680 (2018).
  44. Ohno, Y., Maehashi, K., Yamashiro, Y. & Matsumoto, K. Electrolyte-Gated Graphene Field-Effect Transistors for Detecting pH and Protein Adsorption. *Nano Lett.* **9**, 3318–3322 (2009).
  45. Hess, L. H. *et al.* High-transconductance graphene solution-gated field effect transistors. *Appl. Phys. Lett.* **99**, 2009–2012 (2011).
  46. Rosenblatt, S. *et al.* High Performance Electrolyte Gated Carbon Nanotube Transistors. *Nano Lett.* **2**, 869–872 (2002).
  47. Scuratti, F. *et al.* Real-Time Monitoring of Cellular Cultures with Electrolyte-Gated Carbon Nanotube Transistors. *ACS Appl. Mater. Interfaces* **11**, 37966–37972 (2019).
  48. Ha, M. *et al.* Printed, sub-3V digital circuits on plastic from aqueous carbon nanotube inks. *ACS Nano* **4**, 4388–4395 (2010).
  49. Li, H. *et al.* Polyfluorinated Electrolyte for Fully Printed Carbon Nanotube Electronics. *Adv. Funct. Mater.* **26**, 6914–6920 (2016).

50. Cardenas, J. A., Lu, S., Williams, N. X., Doherty, J. L. & Franklin, A. D. In-Place Printing of Flexible Electrolyte-Gated Carbon Nanotube Transistors with Enhanced Stability. *IEEE Electron Device Lett.* **42**, 367–370 (2021).
51. Kelly, A. G. *et al.* All-printed thin-film transistors from networks of liquid-exfoliated nanosheets. *Science (80-. )*. **356**, 69–73 (2017).
52. Masurkar, N., Kumar, N., Yurgelevic, S. & Varma, S. Reliable and highly sensitive biosensor from suspended MoS<sub>2</sub> atomic layer on nano-gap electrodes. *Biosensors* **172**, 112724 (2020).
53. Tang, H. *et al.* Realizing Wafer-Scale and Low-Voltage Operation MoS<sub>2</sub> Transistors via Electrolyte Gating. *Adv. Electron. Mater.* **6**, 1–7 (2020).
54. Gao, G. *et al.* Triboiontronic Transistor of MoS<sub>2</sub>. *Adv. Mater.* **31**, 1–10 (2019).
55. Rühl, S. *et al.* Benchmarking Electrolyte-Gated Monolayer MoS<sub>2</sub> Field-Effect Transistors in Aqueous Environments. *Phys. Status Solidi - Rapid Res. Lett.* **2100147**, (2021).
56. Higgins, T. M. *et al.* Electrolyte-Gated n-Type Transistors Produced from Aqueous Inks of WS<sub>2</sub> Nanosheets. *Adv. Funct. Mater.* **29**, (2019).
57. Guo, L. Q. *et al.* Starch-based biopolymer electrolyte gated oxide synaptic transistors. *Org. Electron.* **61**, 312–317 (2018).
58. Ren, X. *et al.* Gate-Tuned Insulator-Metal Transition in Electrolyte-Gated Transistors Based on Tellurene. *Nano Lett.* **19**, 4738–4744 (2019).
59. Diacci, C. *et al.* Label-free detection of interleukin-6 using electrolyte gated organic field effect transistors. *Biointerphases* **12**, 05F401-6 (2017).
60. Casalini, S. *et al.* Multiscale sensing of antibody-antigen interactions by organic transistors and single-molecule force spectroscopy. *ACS Nano* **9**, (2015).
61. White, S. P., Dorfman, K. D. & Frisbie, C. D. Label-free DNA sensing platform with low-voltage electrolyte-gated transistors. *Anal. Chem.* **87**, 1861–1866 (2015).
62. Parkula, V. *et al.* EGOFET Gated by a Molecular Electronic Switch: A Single-Device Memory Cell. *Adv. Electron. Mater.* **5**, (2019).
63. Parkula, V. *et al.* Harnessing selectivity and sensitivity in electronic biosensing: A Novel Lab-on-Chip Multigate Organic Transistor. *Anal. Chem.* **92**, 9330–9337 (2020).
64. Nguyen, T. T. K. *et al.* Peptide-modified electrolyte-gated organic field effect transistor. Application to Cu<sup>2+</sup> detection. *Biosens. Bioelectron.* **127**, 118–125 (2019).
65. Bélanger, D. & Pinson, J. Electrografting: A powerful method for surface modification. *Chem. Soc. Rev.* **40**, 3995–4048 (2011).
66. Macchia, E. *et al.* Single-molecule detection with a millimetre-sized transistor. *Nat. Commun.* **9**, (2018).
67. Selvaraj, M. *et al.* Label free detection of miRNA-21 with Electrolyte Gated Organic Field Effect Transistors (EGOFETs). *Biosens. Bioelectron.* **182**, 113144 (2021).
68. Casalini, S., Leonardi, F., Cramer, T. & Biscarini, F. Organic field-effect transistor for label-free dopamine sensing. *Org. Electron. physics, Mater. Appl.* **14**, 156–163 (2013).
